# Supplementary material for: Strategic design to create HER2-targeting proteins with target-binding peptides immobilized on a fibronectin type III domain scaffold
Source: Royal Society of Chemistry journal article supplement (doi:10.1039/d0ra00427h), 2020-01-01
Supplement: d0ra00427h1.pdf [file d0ra00427h1.pdf]

### **Electronic Supplementary Information**

Strategic design to create HER2-targeting proteins with target-binding peptides immobilized on a fibronectin type III domain scaffold

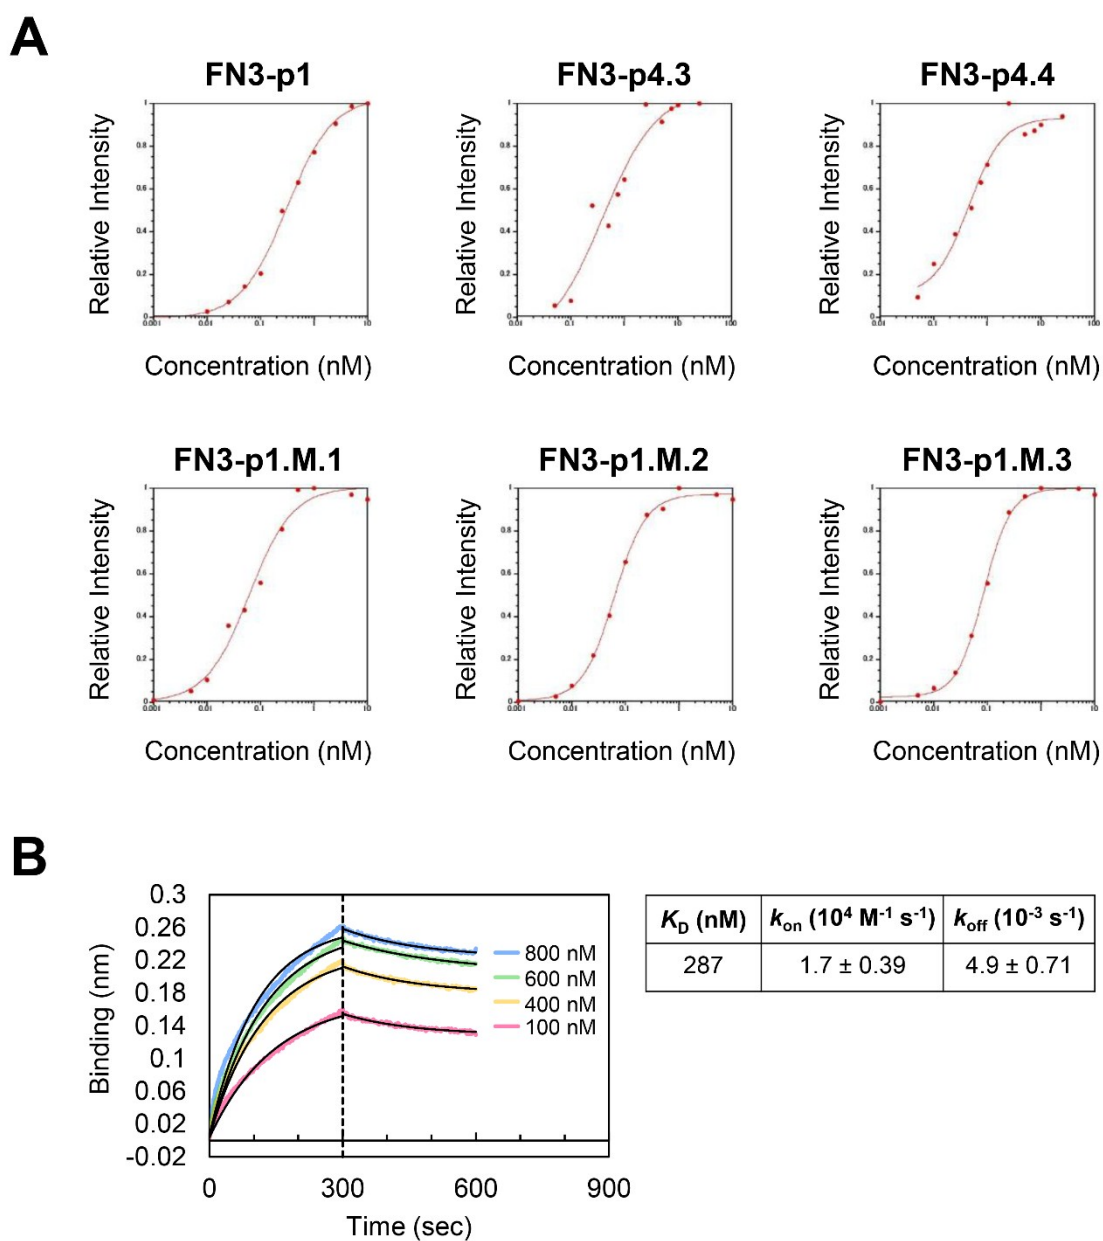

**Figure S1.** Affinity evaluation by ELISA (A) and bi-layer interferometry (B). (A) HER2-Fc was immobilized on ELISA plates and exposed to various concentrations of FN3-p1, FN3-p4.3, FN3-p4.4, FN3-p1.M.1, FN3-p1.M.2, or FN3-p1.M.3 proteins with His-tag. Binding was detected with an HRP-conjugated anti-His tag antibody. The results are representative of three experiments. (B) Biotinylated HER2-Fc was immobilized on streptavidin biosensors and exposed to several concentrations of HBP-FLAP. The representative sensorgrams from three experiments (left) and binding kinetics (right) were shown.

**A**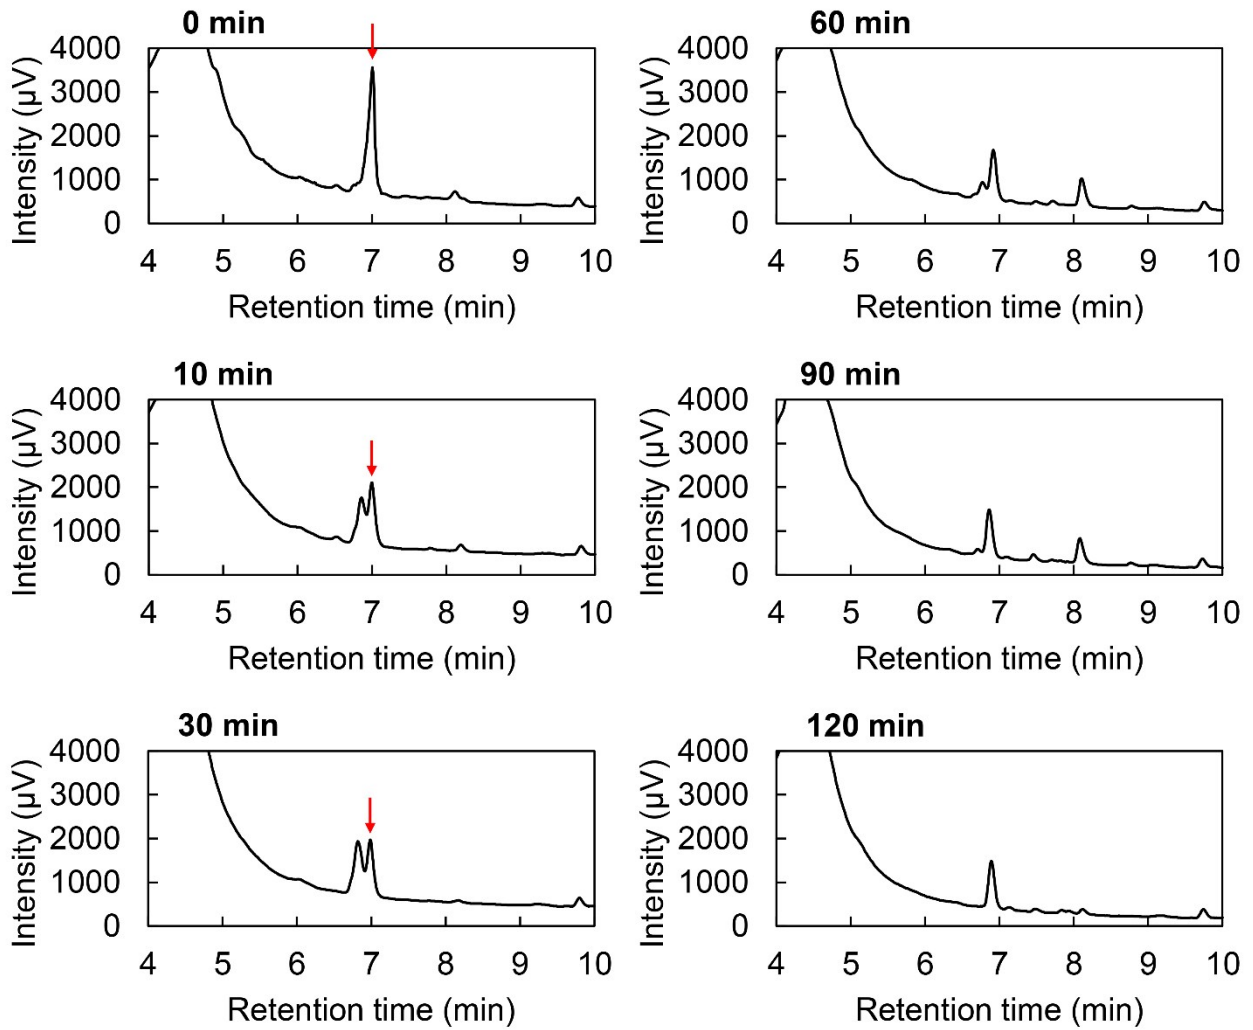**B**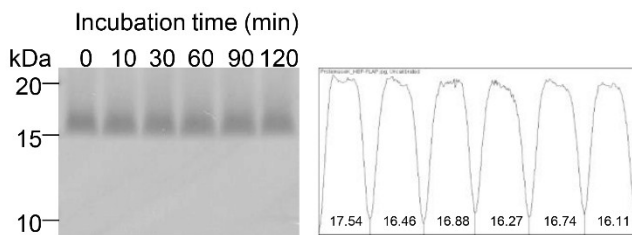

**Figure S2.** Proteinase K digestion. (A) HPLC analysis of p1.M.2 peptide digestion by proteinase K. C-terminally elongated peptides appeared at 7 min (red arrow) in retention time. (B) SDS-PAGE analysis (left panel) and a measurement of band intensity (right panel) of FN3-p1.M.2 treated with proteinase K at the indicated times.

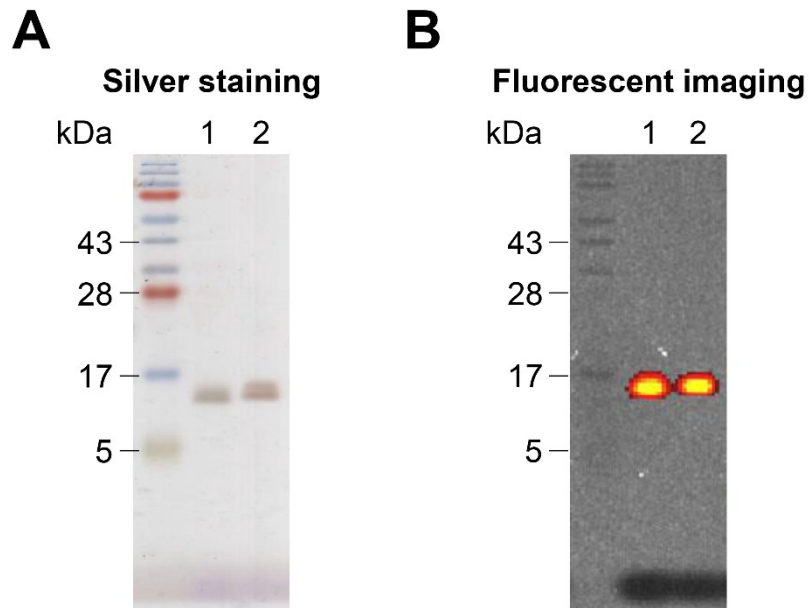

**Figure S3.** Preparation of *in vivo* imaging probes. SDS-PAGE analysis of HBP-FLAP-IR800 (1) and FN3-IR800 (2) by silver staining (A) and fluorescent imaging (B).
